# Supplementary material for: Detailed Shoulder MRI Findings in Manual Wheelchair Users with Shoulder Pain
Source: Hindawi journal article supplement (doi:10.1155/2014/769649), 2014-01-01
Supplement: f1 [file 769649.f1.pdf]

## MRI Assessment of the Shoulder

### ***Supraspinatus***

---

|                     |                                                                                   |
|---------------------|-----------------------------------------------------------------------------------|
| <b>Tear(s)</b>      | No/Partial/Full/Complete                                                          |
| <b>Location(s)</b>  | Insertion/tendon/critical zone<br>Intrasubstance/bursal/articular<br>ant/mid/post |
| <b>Tendinopathy</b> | 0/mild/moderate/severe                                                            |
| <b>Location(s)</b>  | ant/mid/post                                                                      |
| <b>Atrophy</b>      | 0/mild/moderate/severe                                                            |

### ***Infraspinatus***

---

|                     |                                                                                   |
|---------------------|-----------------------------------------------------------------------------------|
| <b>Tear(s)</b>      | No/Partial/Full/Complete                                                          |
| <b>Location(s)</b>  | Insertion/tendon/critical zone<br>Intrasubstance/bursal/articular<br>ant/mid/post |
| <b>Tendinopathy</b> | 0/mild/moderate/severe                                                            |
| <b>Location(s)</b>  | ant/mid/post                                                                      |
| <b>Atrophy</b>      | 0/mild/moderate/severe                                                            |

### ***Teres minor***

---

|                     |                                                                                   |
|---------------------|-----------------------------------------------------------------------------------|
| <b>Tear(s)</b>      | No/Partial/Full/Complete                                                          |
| <b>Location(s)</b>  | Insertion/tendon/critical zone<br>Intrasubstance/bursal/articular<br>ant/mid/post |
| <b>Tendinopathy</b> | 0/mild/moderate/severe                                                            |
| <b>Location(s)</b>  | ant/mid/post                                                                      |
| <b>Atrophy</b>      | 0/mild/moderate/severe                                                            |

### ***Subscapularis***

---

|                     |                                                                                  |
|---------------------|----------------------------------------------------------------------------------|
| <b>Tear(s)</b>      | No/Partial/Full/Complete                                                         |
| <b>Location(s)</b>  | Insertion/tendon/critical zone<br>Intrasubstance/bursal/articular<br>sup/mid/inf |
| <b>Tendinopathy</b> | 0/mild/moderate/severe                                                           |
| <b>Location(s)</b>  | sup/mid/inf                                                                      |
| <b>Atrophy</b>      | 0/mild/moderate/severe                                                           |

### **Biceps**

---

**Tear(s)** No/Partial/Split/Complete  
**Location(s)** Extra-articular/Intra-articular/Bicep anchor

**Tendinopathy** 0/mild/moderate/severe  
**Location(s)** Extra-articular/Intra-articular

### **AC joint**

---

**Degen arthrosis** 0/mild/moderate/severe  
**Subacromial spurs?** YES/NO  
**Subchondral edema/cystic change?** YES/NO

### **Acromion**

---

**Type** I/II/III  
**Lateral downsloping** YES/NO  
**Convex undersurface** YES/NO

### **CA Ligament**

---

**Thickening?** YES/NO

### **Bursitis**

---

**YES/NO**  
**Location(s)** Subacrom/Subcorac

### **Labrum**

---

**Degenerative Irregularity?** YES/NO

**SLAP Tears?** YES/NO  
**Location(s)** AntSup/PostSup/AntInf/PostInf

**Paralabral Ganglions?** YES/NO

### **Glenohumeral joint**

---

**Degen arthrosis** 0/mild/moderate/severe  
**Subchondral edema/cystic change?** YES/NO  
**Chondromalacia** 0/mild/moderate/severe

### **Other**

---
